# Supplementary material for: Patterns of Genome-Wide VDR Locations
Source: PubMed Central journal article supplement (PMC4005760; doi:10.1371/journal.pone.0096105), 2014-04-30

**Fig. S1**

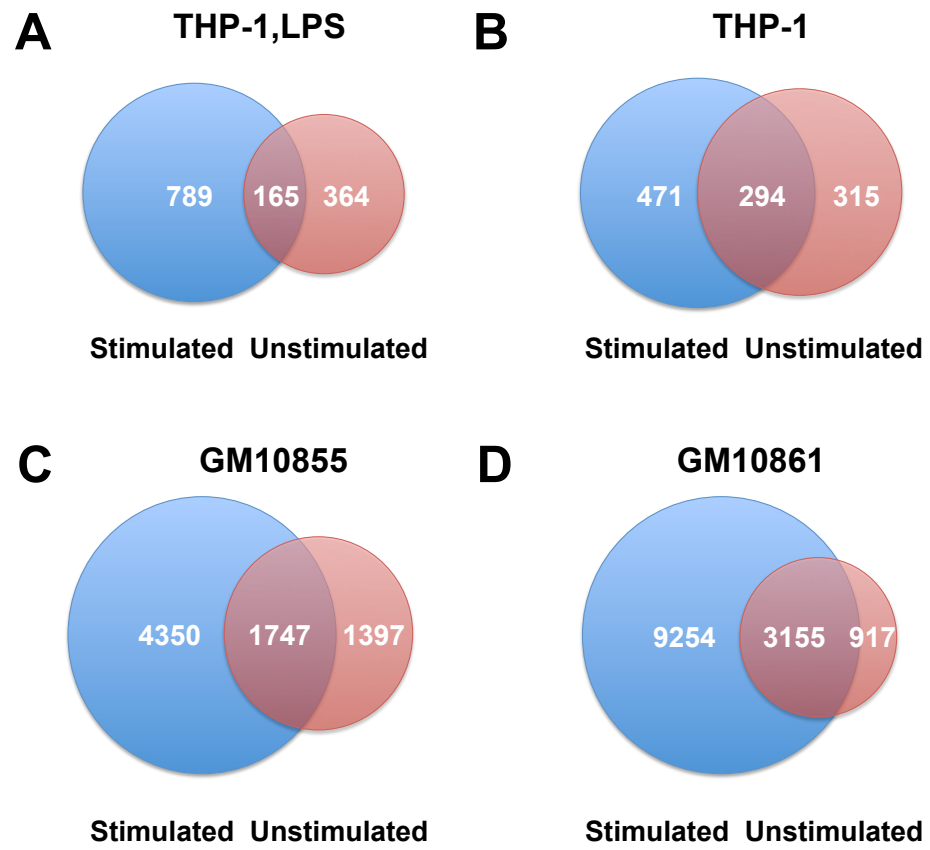

Supplement: pone.0096105.s001.pdf [file pone.0096105.s001.pdf]
